# Supplementary material
Source: PubMed Central journal article supplement (PMC7580258)
Supplement: NIHMS1638028-supplement-Supp_Table_1.pdf [file NIHMS1638028-supplement-Supp_Table_1.pdf]

## Supplemental Table 1

Table 1. Summary of DUSP26 IHC on NB Tissue Specimen

| (n)             | Average MKP8 IHC Score | STDEV |
|-----------------|------------------------|-------|
| <b>COG RS</b>   |                        |       |
| Low Risk (8)    | 3.38                   | 1.98  |
| Inter. Risk (2) | 3                      | 1.41  |
| High Risk (7)   | 5.14*                  | 1.07  |
