# Supplementary material
Source: PubMed Central journal article supplement (PMC7580258)

## Supplemental Figure 2

**a**

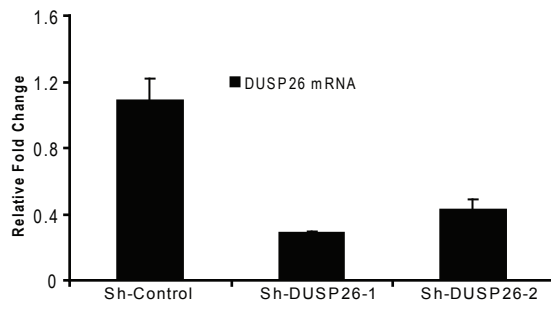

**b**

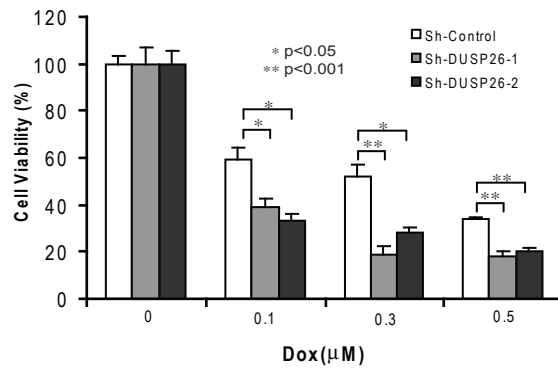

**c**

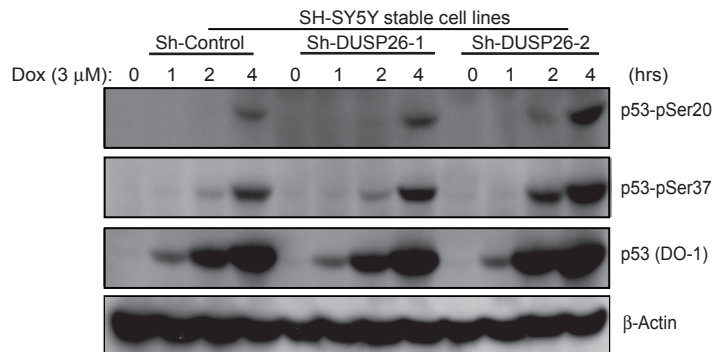

**d**

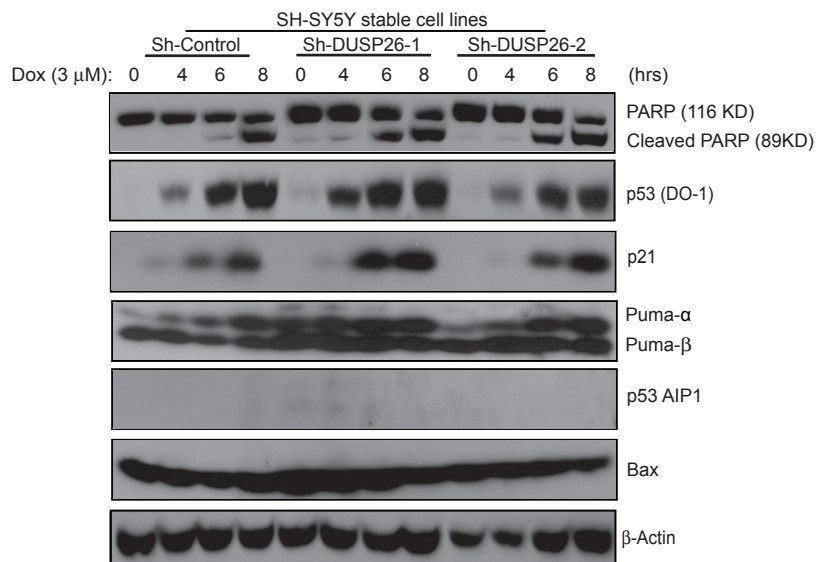

Supplement: NIHMS1638028-supplement-Sup_Fig_2.pdf [file NIHMS1638028-supplement-Sup_Fig_2.pdf]

Supplemental Figure 1

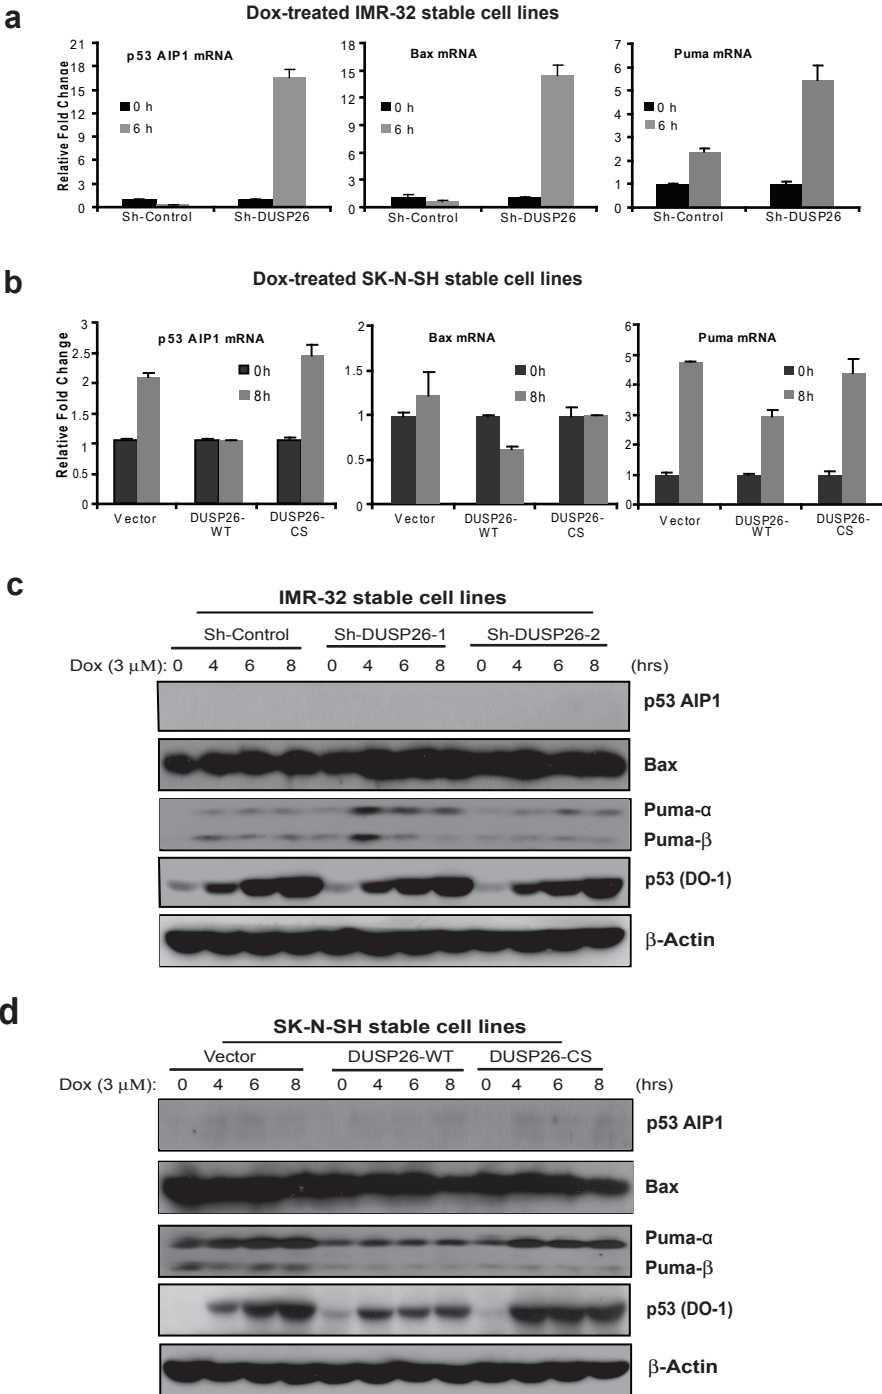

Supplement: NIHMS1638028-supplement-Supp_Fig_1.pdf [file NIHMS1638028-supplement-Supp_Fig_1.pdf]

Supplemental Figure 3

a

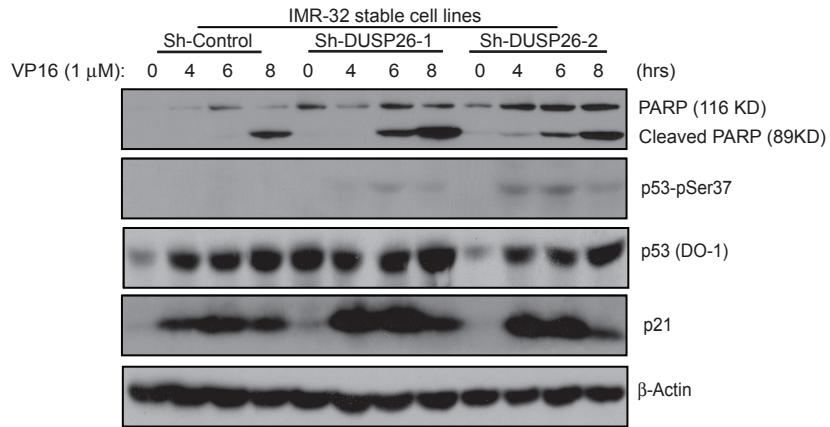

b

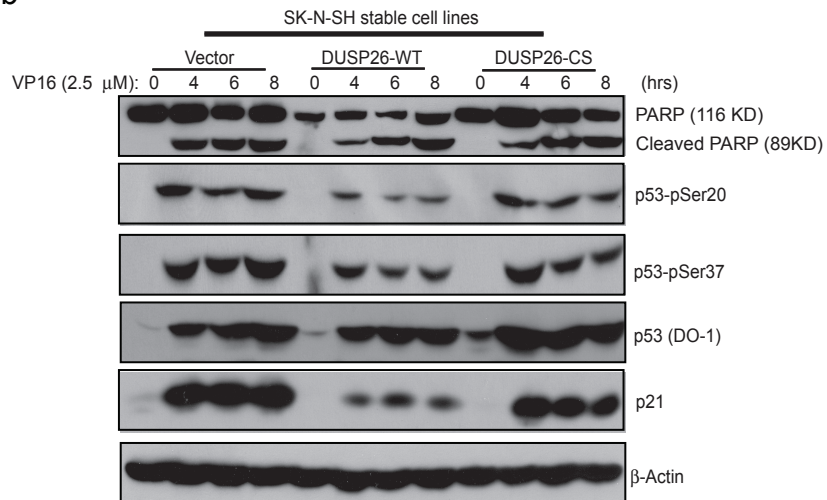

Supplement: NIHMS1638028-supplement-Supp_fig_3.pdf [file NIHMS1638028-supplement-Supp_fig_3.pdf]

## Supplemental Figure 4

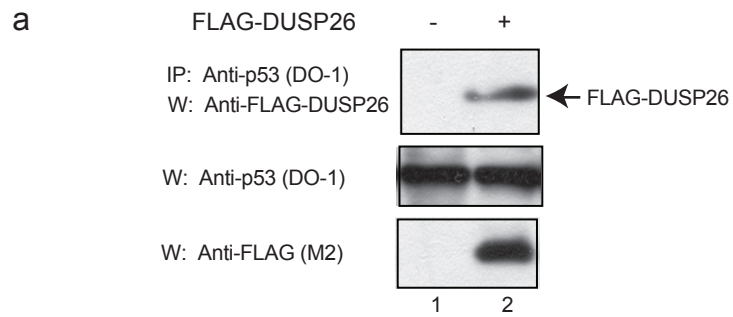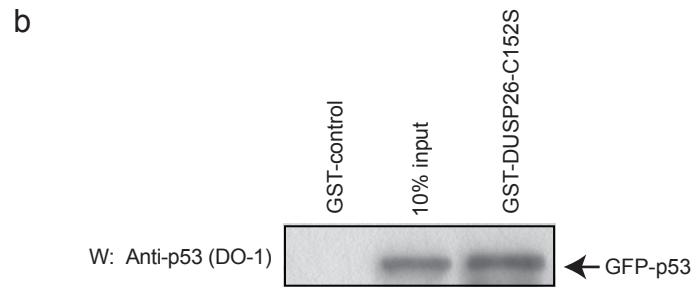

Supplement: NIHMS1638028-supplement-Supp_fig_4.pdf [file NIHMS1638028-supplement-Supp_fig_4.pdf]

# Supplemental Figure 5

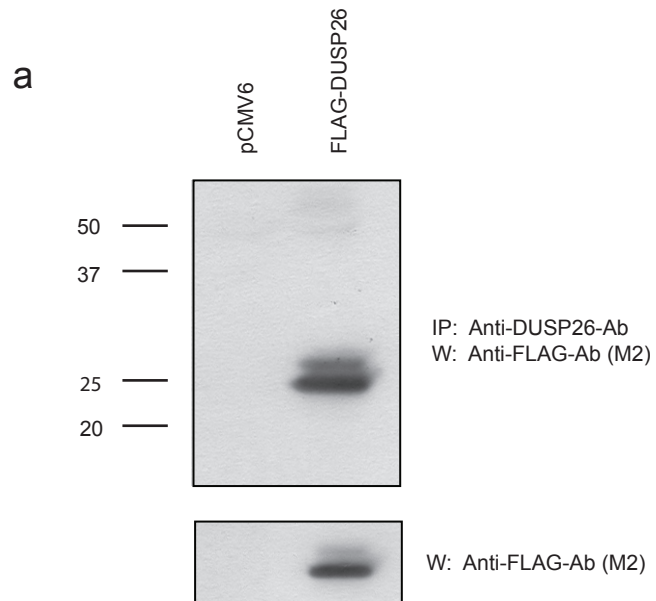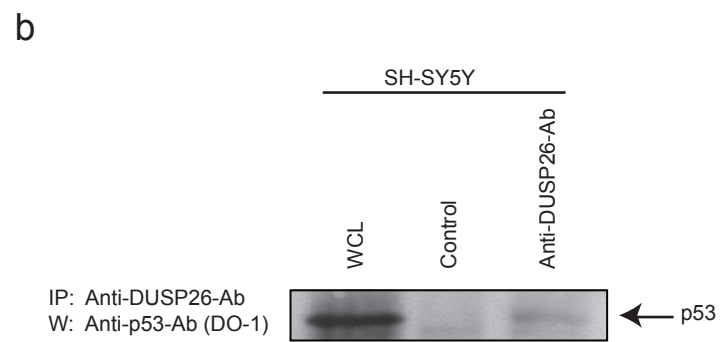

Supplement: NIHMS1638028-supplement-Supp_fig_5.pdf [file NIHMS1638028-supplement-Supp_fig_5.pdf]
